# Supplementary material
Source: publisher figshare collection journal article supplement (https://acs.figshare.com/ndownloader/files/4198555)
Supplement: Supplementary file 1 [file 4198555]

## Supplemental Materials

for “**Mapping general anesthetic binding site(s) in human  $\alpha 1\beta 3$   $\gamma$ -aminobutyric acid type A (GABA<sub>A</sub>) receptors with [<sup>3</sup>H]TDBzl-etomidate, a photoreactive etomidate analog**” by Chiara, DC, Dostalova, Z, Jayakar, SS, Zhou, X, Miller, KW, and Cohen, JB.

## Methods

***Docking anesthetics in GABA<sub>A</sub>R homology models.*** CDocker (Wu et al., (2003) *J. Comp. Chem.* 24, 1549-1562), a CHARMM-based molecular dynamics simulated annealing program, was used to dock drugs into potential binding pockets in the  $\alpha\beta$  GABA<sub>A</sub>R transmembrane domain ( $\beta 3$ - $\alpha 1$  or  $\beta 3$ - $\beta 3$  interfaces, the  $\alpha 1$  and  $\beta 3$  subunit helix bundles, and the ion channel) in the homology models based upon the GLIC and the GluCl structures. Because the side chains of GABA<sub>A</sub>R amino acids that are not conserved in the homology model templates (GLIC or GluCl) have random rotamers, the rotamers of those nonconserved amino acids are not identical at each of the  $\beta 3$ - $\alpha 1$  interfaces despite the fact that the orientations of the helices are the same. The homology models were initially subjected to twenty cycles of energy minimization to ensure that no side chains were positioned in energetically unfavorable positions. Prior to minimization, *S*-TDBzl-etomidate was positioned in the GLIC-based model in each interface site at the level of  $\beta 3$ Phe-289 in  $\beta 3$ M3, while no drug was positioned in that site in the GluCl-based model, which was derived from a structure with ivermectin bound at that interface between subunits.

For the  $\beta 3$ - $\alpha 1$  interface site in the GLIC-derived model, a 16 Å diameter binding site sphere was centered at the level of  $\beta 3$ Phe-289. CDocker was configured to generate, using high temperature molecular dynamics, 50 random ligand conformations which were each docked in 30 random orientations and refined, using simulated annealing and a full potential final minimization step, to obtain energy minimized solutions for each drug. Solutions were ranked according to the calculated CDocker interaction energies, and the orientations of bound drugs were compared for the 100 lowest energy solutions. The

Connolly surfaces (Connolly (1983) *Science* 221, 709-713) defined by a 1.4 Å probe, of *R*-TDBzl-etomidate (volume, 325 Å<sup>3</sup>) docked at the β3-α1 sites in the 100 lowest energy solutions define volumes of 717 and 810 Å<sup>3</sup> in the ββ-α and αβ-α sites, respectively, and for the 14 lowest energy solutions a volume of 511 Å<sup>3</sup> (Figures 8B-E). The amino acids contributing to the predicted TDBzl-etomidate binding site are shown in stereo representation in Supplemental Figures S4 and S5. A similar binding site for TDBzl-etomidate was obtained when the diameter of the binding site sphere was increased to 18 or 20 Å (not shown), or when TDBzl-etomidate was docked in the GluCl-derived model (Supplemental Figure S5).

A similar protocol, using an 18 Å diameter sphere, was used to dock drugs at the β3-β3 interface (Supplemental Figure S6). TDBzl-etomidate was docked in the β3 and α1 subunit helix bundles, using binding site spheres (diameter, 20 Å) centered at the level of M2-13 (80 initial ligand conformations, each in 30 random orientations) (Supplemental Figure S7).

|                               | M1                                                                                                                                            | M2 | M3 | M4 |
|-------------------------------|-----------------------------------------------------------------------------------------------------------------------------------------------|----|----|----|
| <i>T mar</i> nAChR $\alpha$ - | RPLPFSFVNLVFLPTDS-GERKMTLSISVLLSLTVFLVIVLLEPSTSSAVPLIGKYMLETMIFVSIISIVTVVWINTHHRSP.....KVAMVIDHILLCVFMLEICIIIGTVCVVFAGRIELSQEG                |    |    |    |
| <i>T mar</i> nAChR $\beta$ -  | RPLFVIVIVPCIIISIIAILVFLPPDA-GERKMSLSISALLALTVFLLIADKVPETSLSVPIISIIYLMFIMILVAFSVILSVVNLHHRSP.....QYVAMVADBLFLYIFITMCSIGTFSIFLDASHNVPPDN        |    |    |    |
| <i>T mar</i> nAChR $\gamma$ - | RPLFYIINIAPSVHSSVVIVVFLPAQAGGQKCTISISVLLAQTFILFLIAQKVPETSLNVLPIGKYLLITVAFVSLVIVTNCVIVNLVSLRTP.....VLIGKVIDKACFWIALILFSLGTALFLLGHINQVPEF       |    |    |    |
| <i>T mar</i> nAChR $\delta$ - | RPLFVIVNFIITPEVLIISFLAALAFYLPAES-GERKMTALCVLLAQVFLILTSQRIPEETALAVPLIGKYLMFINSLSVTGVVNCGIVLNHFRTIP.....NLVGGTIDRLSLMFIITPPVMVLGTIFIVMGNFNRPDAK |    |    |    |
| <i>H sap</i> GR $\alpha$ 1-   | RKIGVIGTIVLPSITVILISQVSWNEESVPAETVFEVTVTLIDKTTLSISARNSLPKVAYA-----TAMWETAVCAAFVESALIEFEETVNYFTK.....FNSVSKIDELSRFAFLLFGLENLVYATYLNREPQLK      |    |    |    |
| <i>H sap</i> GR $\beta$ 3-    | RNIGTILATMPSTHITILSWGFWINYDASARVALSITGVLDKTTITHTRTIPLKIDYV-----KALDMYLMGCFVFLALLESYFQNYIFF.....LTDVNAIDRWSRIVPFTTSLDENVWLYYVN                 |    |    |    |
| <i>G viol</i> GLIC-           | ROYFSVIPNIIIPMLFILFTSWTAFWST--SYEANTVIVVSLIAHIAFVILVETNLPKTYM-----TYTCAIIFEMIILEFYVAVTEVTVQHLLKV---ESQPARAAASITFASRIAFVFWVILLAILAFLFFGF       |    |    |    |
| <i>C eleg</i> GluCl-          | REFSFYLLGLIPESCHLLIVSWVSFWFDSTAIIPASVTLISVTILLNTAQAGINSQLEPFSYI-----SALDVWIGACMTFTFCALLEFELVHIANAGTTEWNDISKRVDLISALFVDFVFNILVWSRFGH           |    |    |    |

**Supplemental Figure S1:** The amino acid sequence alignments in receptor transmembrane domains used to create the GABA<sub>A</sub>R homology models from the structures of: 1) the *Torpedo marmorata* nAChR (PDB 2BG9) (homology model of Li et al (2006)); 2) a *Gloeobacter violaceus* ligand gated ion channel (GLIC) structure (PDB 3P50); and 3) a *Caenorhabditis elegans* glutamate-gated chloride channel (GluCl) structure (PDB 3RIF). Boxed residues are conserved in all sequences. Color coding: **Magenta**, identity between one or both GABA<sub>A</sub>R subunits and both GLIC & GluCl; **Red**, identity between one or both GABA<sub>A</sub>R subunits and GLIC or GluCl; **Green**, identity between one or more GABA<sub>A</sub>R subunits and one or more *Torpedo marmorata* nAChR subunits; **Cyan**, identity between one or more GABA<sub>A</sub>R subunits, GLIC and/or GluCl, and one or more nAChR subunits. The lines (~) above (nAChR) or below (GLIC and GluCl) the alignments denote the extent of each transmembrane helix in the nAChR, GLIC, or GluCl molecular models. Comparisons between the GLIC and GluCl models in the transmembrane region show that the sequence homology translates into structure homology for M1, M2, and M3. Despite a strong sequence homology between GLIC and GluCl M4, the alignment does not translate structurally in the M4 helices as the conserved residues are displaced by about 1 helical turn.

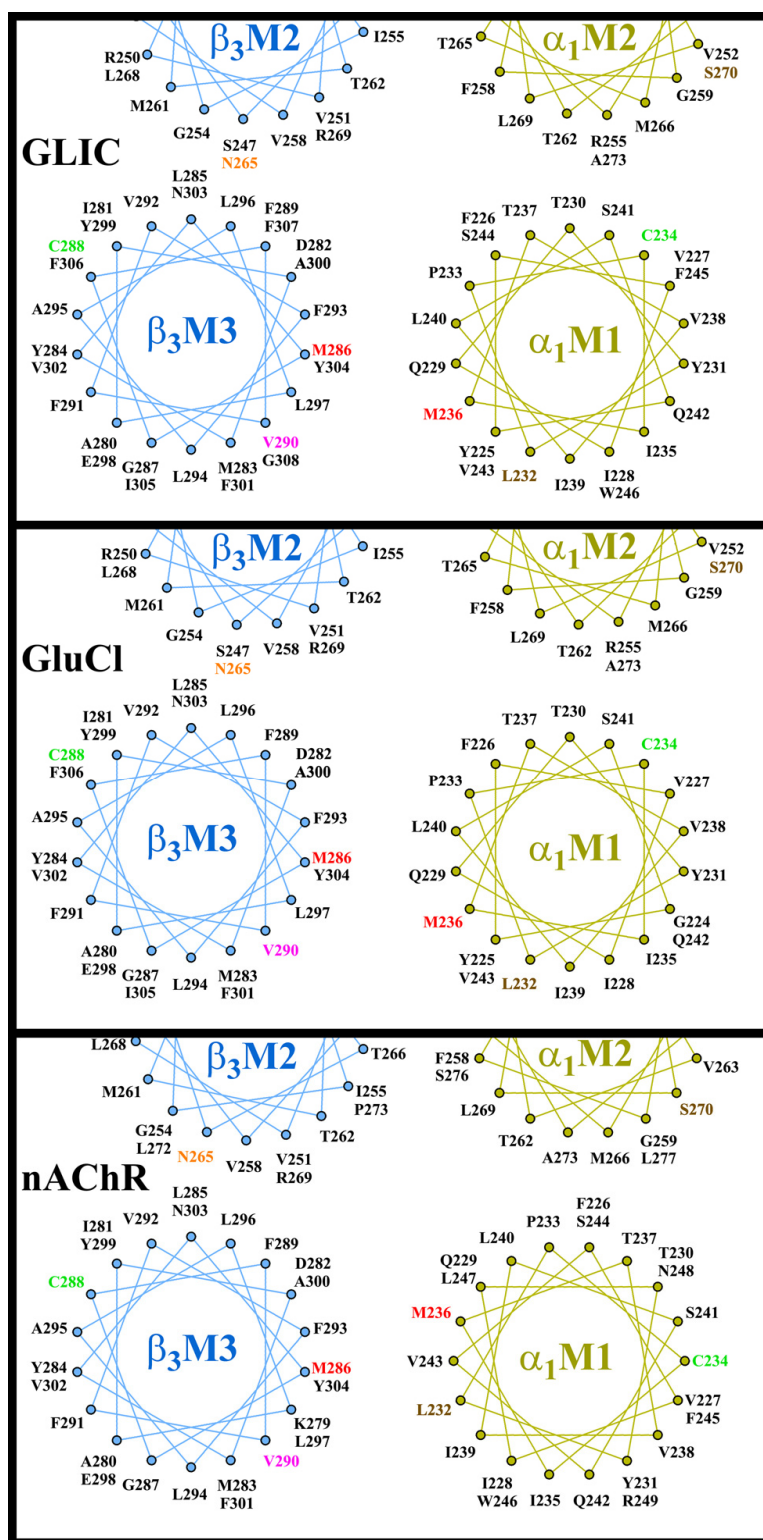

**Supplemental Figure S2: Helical wheel representations of the transmembrane domain  $\beta_3$ - $\alpha_1$  interface in the 3 GABA<sub>A</sub>R homology models, viewed from the base of the extracellular domain. Residues photolabeled by azietomidate ( $\alpha_1$ Met-236,  $\beta_3$ Met-286) or TDBzl-etomidate ( $\beta_3$ Val-290,  $\alpha_1$ Met-236,  $\beta_3$ Met-286,  $\beta_3$ Cys-288, &  $\alpha_1$ Cys-234) and sensitivity determinants for etomidate ( $\beta$ Asn-265) and volatile anesthetics ( $\alpha_1$ Ser-270 &  $\alpha_1$ Leu-232) are color coded.**

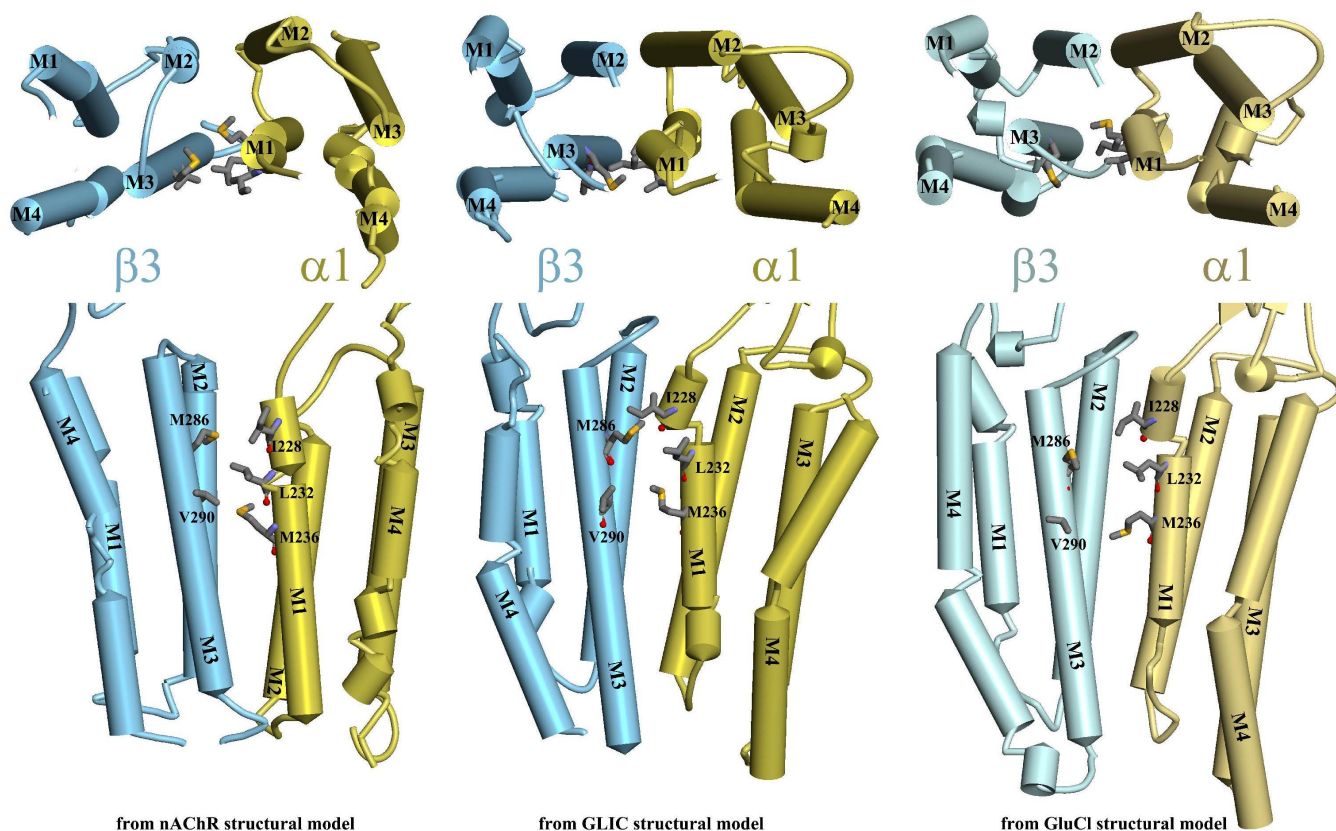

**Supplemental Figure S3: Comparison of the GABA<sub>A</sub>R transmembrane domain β3-α1 interface in the 3 GABA<sub>A</sub>R homology models, viewed from the base of the extracellular domain (upper figures) or from the lipid (lower figures).** Helices are denoted as cylinders. To illustrate the degree of similarity or difference between the models, the Table below tabulates the α-carbon to α-carbon distances (in Å) between β3M3 residues (Val-290 and Met-286) and α1M1 residues (Met-236, Leu-232, and Ile-228). The two values for each measurement are from the two β3-α1 interfaces in each model. These residues are shown in stick format color-coded by atom type: gray, carbon; red, oxygen; blue, nitrogen; and gold, sulfur.

|           |           | nAChR      |  | GLIC       |  | GluCl      |
|-----------|-----------|------------|--|------------|--|------------|
| β3Met-286 | α1Met-236 | 13.3, 13.0 |  | 11.4, 10.8 |  | 10.7, 10.9 |
| β3Met-286 | α1Leu-232 | 11.5, 9.0  |  | 8.8, 9.1   |  | 10.0, 10.0 |
| β3Met-286 | α1Ile-228 | 11.9, 9.3  |  | 6.6, 7.8   |  | 9.5, 9.5   |
|           |           |            |  |            |  |            |
| β3Val-290 | α1Met-236 | 9.7, 8.8   |  | 8.7, 8.4   |  | 9.6, 9.7   |
| β3Val-290 | α1Leu-232 | 10.5, 7.4  |  | 10.1, 9.9  |  | 12.3, 12.2 |
| β3Val-290 | α1Ile-228 | 13.5, 11.1 |  | 11.7, 11.6 |  | 14.2, 14.2 |

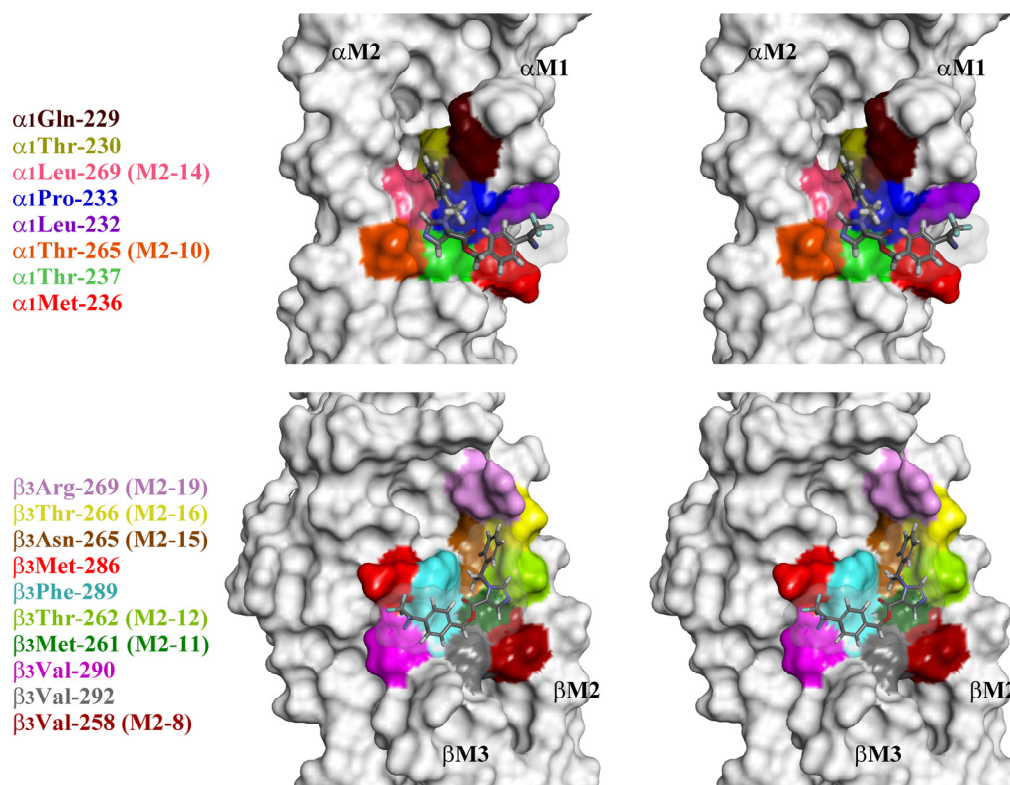

**Supplemental Figure S4: GABA<sub>A</sub>R amino acids contributing to the TDBzl-etomidate pocket at the  $\beta$ 3- $\alpha$ 1 interface.** Connolly surfaces are shown in stereo representation of the opposing surfaces from the  $\alpha$ 1 (upper panels) and  $\beta$ 3 (lower panels) subunits, with color-coding for the amino acids contributing to the pocket. TDBzl-etomidate, in its predicted lowest energy orientation, is included in stick structure, color-coded by atom type: gray, carbon; blue, nitrogen; red, oxygen, white, hydrogen; and cyan, fluorine).

GLIC

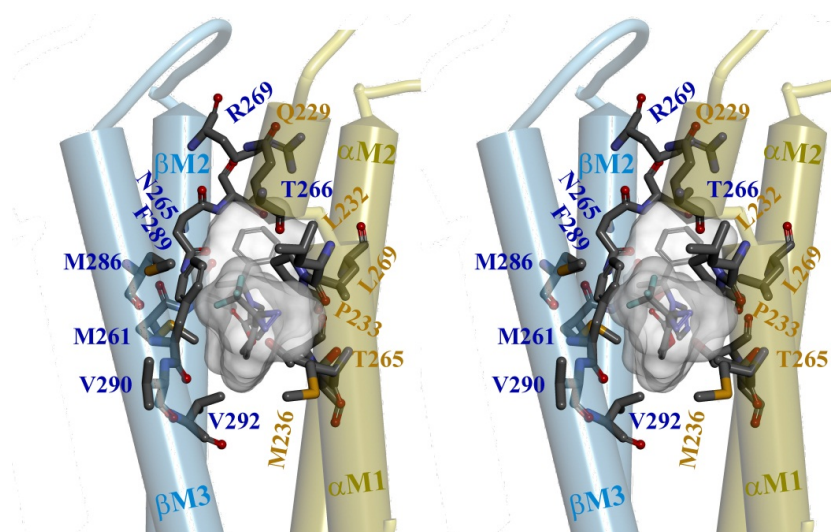

GluCl

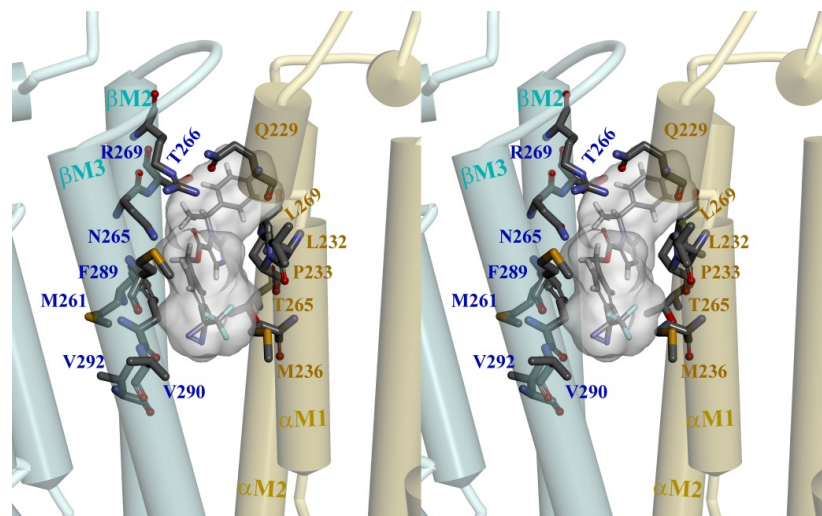

**Supplemental Figure S5: Comparison of *R*-TDBzl-etomidate docked into a  $\beta$ 3- $\alpha$ 1 interface site in GABA<sub>A</sub>R homology models derived from the structure of GLIC and of GluCl.** In the stereo representations, helices are shown as cylinders whereas *R*-TDBzl-etomidate, in its lowest energy orientation, and GABA<sub>A</sub>R amino acids in proximity are shown in stick format, color-coded by atom type: gray, carbon; blue, nitrogen; red, oxygen, white, hydrogen (excluded for residues); gold, sulfur; and cyan, fluorine. Connolly surfaces (transparent white) are included in the upper panel for the 14 (of 100) lowest energy orientations, or, in the lower panel, for the 126 (of 400) orientations with the diazirine facing  $\beta$ 3Val-290/ $\alpha$ 1Met-236.

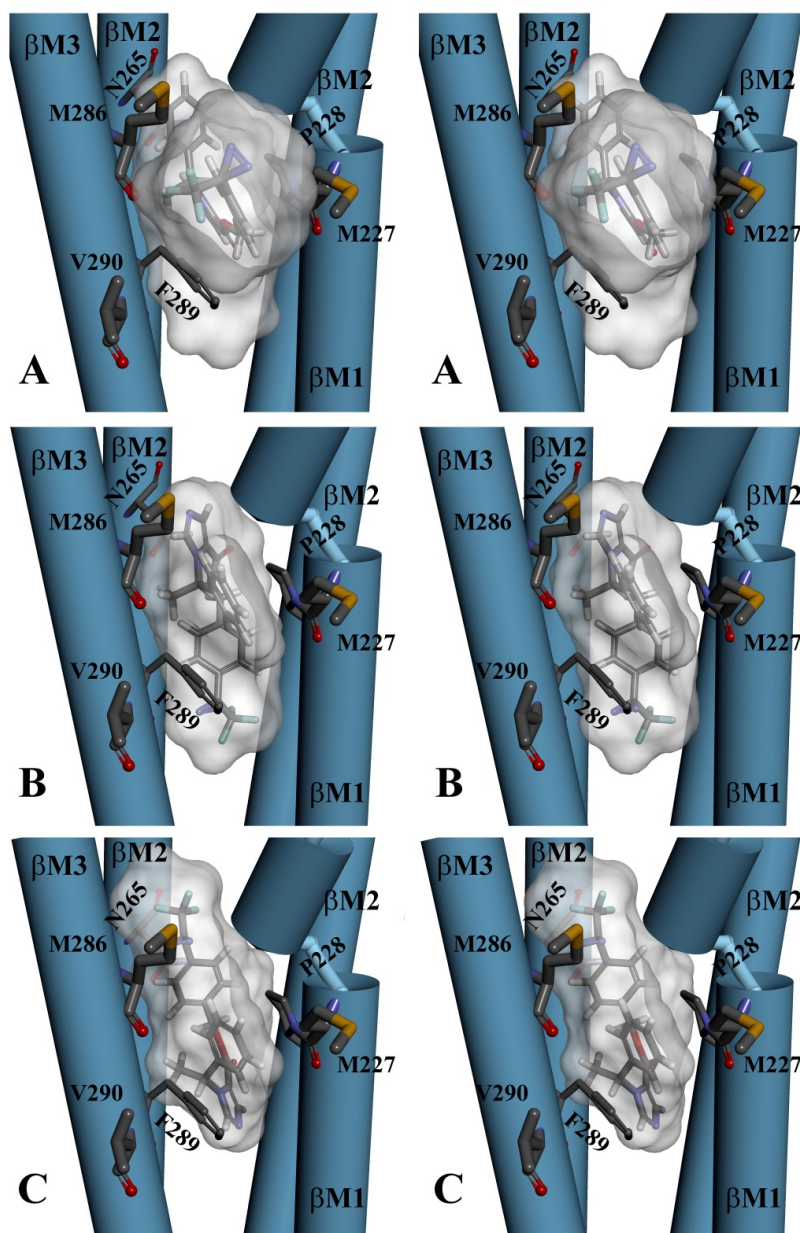

**Supplemental Figure S6: *R*-TDBzl-etomidate docks in a pocket at the GABA<sub>A</sub>R β3-β3 interface in 3 orientations.** In a β3β3αβ3α GABA<sub>A</sub>R, the interface between adjacent β3 subunits (shown in stereo) juxtaposes βM3/βM2 from one subunit and βM1/βM2 from the other. *R*-TDBzl-etomidate and selected nearby GABA<sub>A</sub>R amino acids are shown in stick format, color-coded by atom type: gray, carbon; blue, nitrogen; red, oxygen; white, hydrogen (excluded for residues); gold, sulfur; and cyan, fluorine. Connolly surfaces (transparent white) are included for the composite volumes defined in the 100 lowest energy docking solutions, for *R*-TDBzl-etomidate docked: **A**, horizontally with the diazirine in proximity to photolabeled β3Met-227 in βM1 (14/100); **B**, vertically, with the diazirine in proximity to β3Thr-260 (βM2-10, not highlighted, 66/100), or **C**, vertically with the diazirine near β3Asn-265 (βM2-15, 19/100).

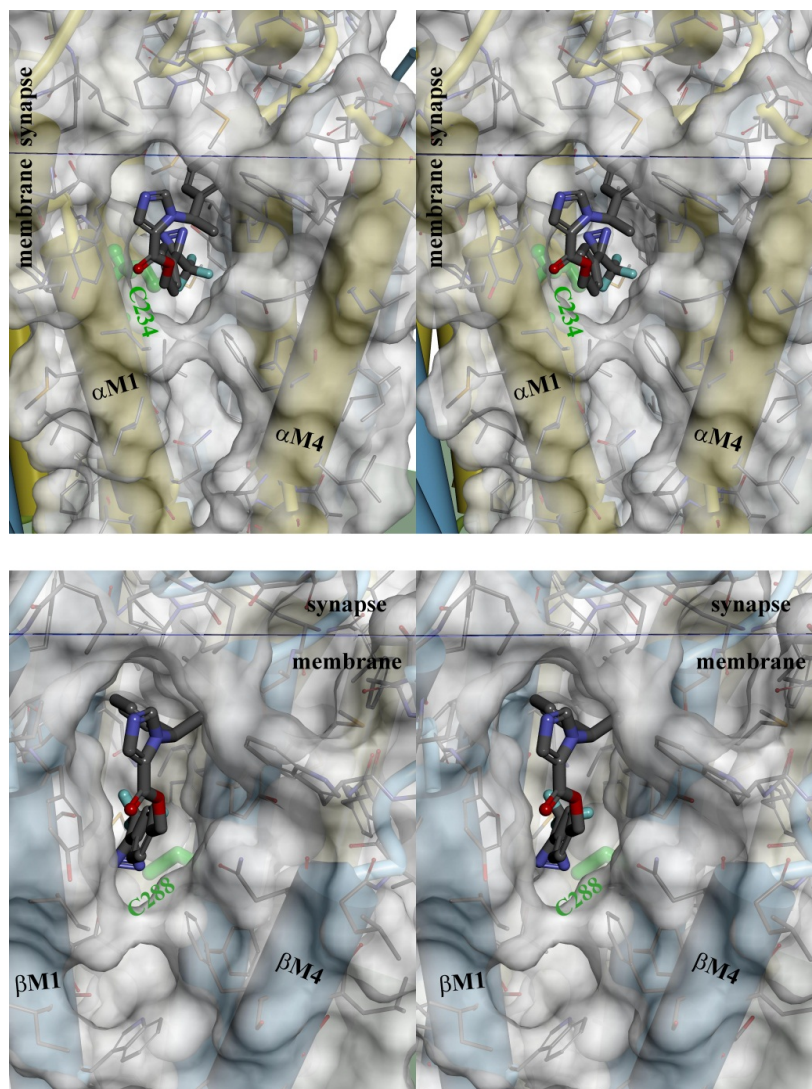

**Supplemental Figure S7: In the GABA<sub>A</sub>R homology model derived from the structure of GLIC, TDBzl-etomidate has access from the lipid to the pockets within the  $\alpha$  and  $\beta$  subunit helix bundles.** Stereo views from the lipid are shown of an  $\alpha 1$  subunit (upper) and a  $\beta 3$  subunit (lower), each covered by transparent Connolly surfaces with their amino acids in thin stick format. Included in thick stick format is TDBzl-etomidate, docked in its lowest energy orientation (out of 300) in the pockets in each subunit formed by the helix bundles. TDBzl-etomidate is colored by atom type (black, carbon; red, oxygen; blue, nitrogen; cyan, fluorine). In this orientation its diazine is predicted to be in proximity to the photolabeled  $\alpha 1$ Cys-234 (green, upper figure) and  $\beta 3$ Cys-288 (green, lower figure).

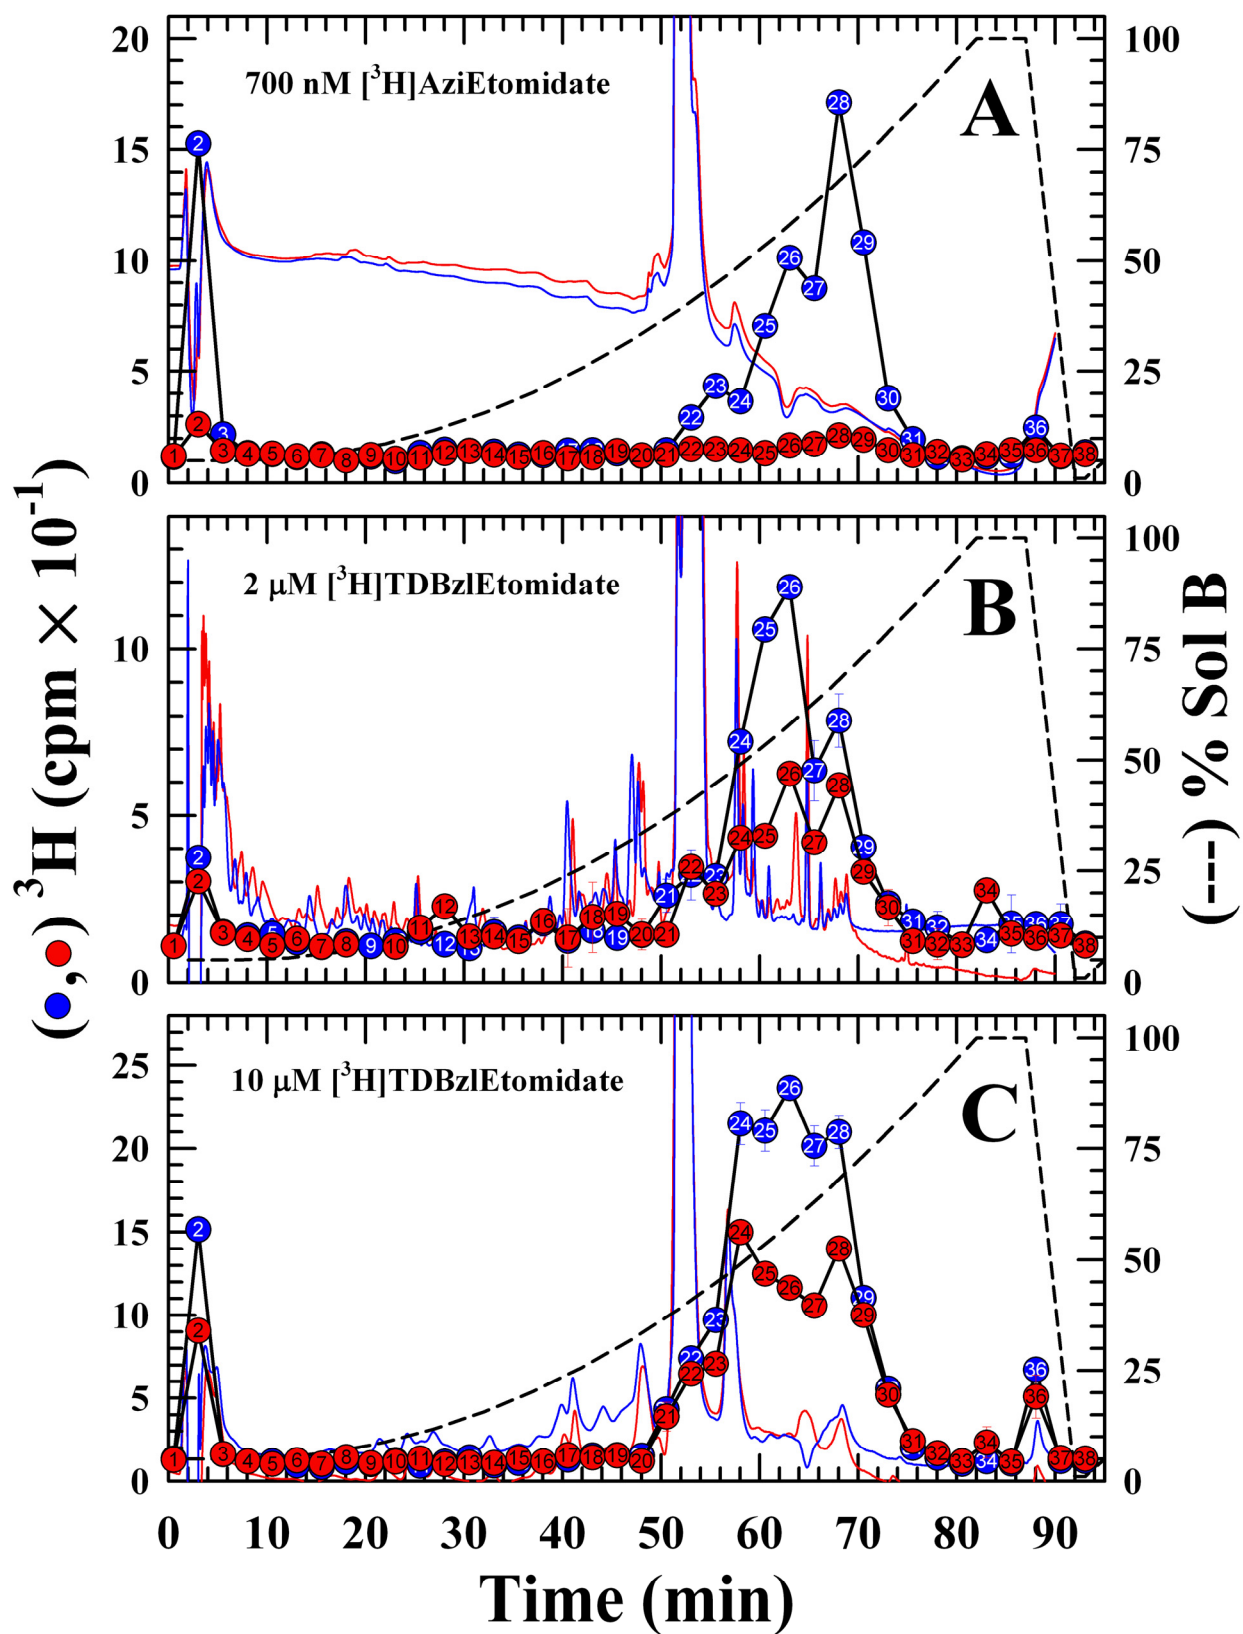

Supplemental Figure S8

**Supplemental Figure S8: Reversed-phase HPLC fractionations of EndoGlu-C digests of [<sup>3</sup>H]azietomidate (A) and [<sup>3</sup>H]TDBzl-etomidate (B & C) photolabeled  $\beta$ 3 subunits.** Aliquots of  $\beta$ 3 subunit, eluted from SDS-PAGE separations of  $\alpha$ 1 $\beta$ 3 GABA<sub>A</sub>R photolabeled with 700 nM [<sup>3</sup>H]AziEtomidate (A), 2  $\mu$ M [<sup>3</sup>H]TDBzl-etomidate (B), or 10  $\mu$ M [<sup>3</sup>H]TDBzlEtomidate (C) in the presence of 1 mM GABA and in the absence (**blue**) or presence (**red**) of 100  $\mu$ M etomidate were digested with EndoGlu-C (Princeton Separations, 5  $\mu$ g, 2-3 days, 20 °C) and separated by reversed-phase HPLC. Ten percent of each fraction was assayed for <sup>3</sup>H (●, ●). Also shown are the absorbance at 215 nm (**red** / **blue** line) and the HPLC gradient (in % organic phase, ---). Total <sup>3</sup>H cpm injected and recovered (-Et / +Et): A, **10,640** and **8,020** cpm/ **810** and **1,000** cpm; B, **5,320** and **5,820** cpm/ **3,330** and **3,660** cpm; C, **23,080** and **15,760** cpm/ **14,990** cpm and **10,410** cpm.

Previous HPLC fractionations of EndoGlu-C digests of the  $\beta$ 3 subunit (Li, Chiara et al., J. Neurosci.26:11599-11605 (2006)) established that a fragment beginning at  $\beta$ 3Gly-386 and containing M4 elutes in fraction 24 (50 % organic), a fragment beginning at  $\beta$ 3Thr-271 and including  $\beta$ 3M3 elutes between fractions 25 and 27 (55-65% organic), and a fragment beginning at  $\beta$ 3His-191 that contains  $\beta$ 3M1 and M2 elutes around fraction 28 (70 % organic). For each HPLC run, fractions 25-27 were pooled and sequenced as shown in Figs. **6A, C, & E**.

Sequence analysis of fractions 28-29 from **A** is shown in Fig **7A**. For unknown reasons, this peptide, when sequenced, began at  $\beta$ 3Gly-203 rather than the expected V8 protease cleavage site ( $\beta$ 3His-191). While this unusual cleavage occurred in both samples from the labeling in **A**, the fragment beginning at  $\beta$ 3His-191 was found in those fractions in three other preparative labelings, including Fig. **7B**.

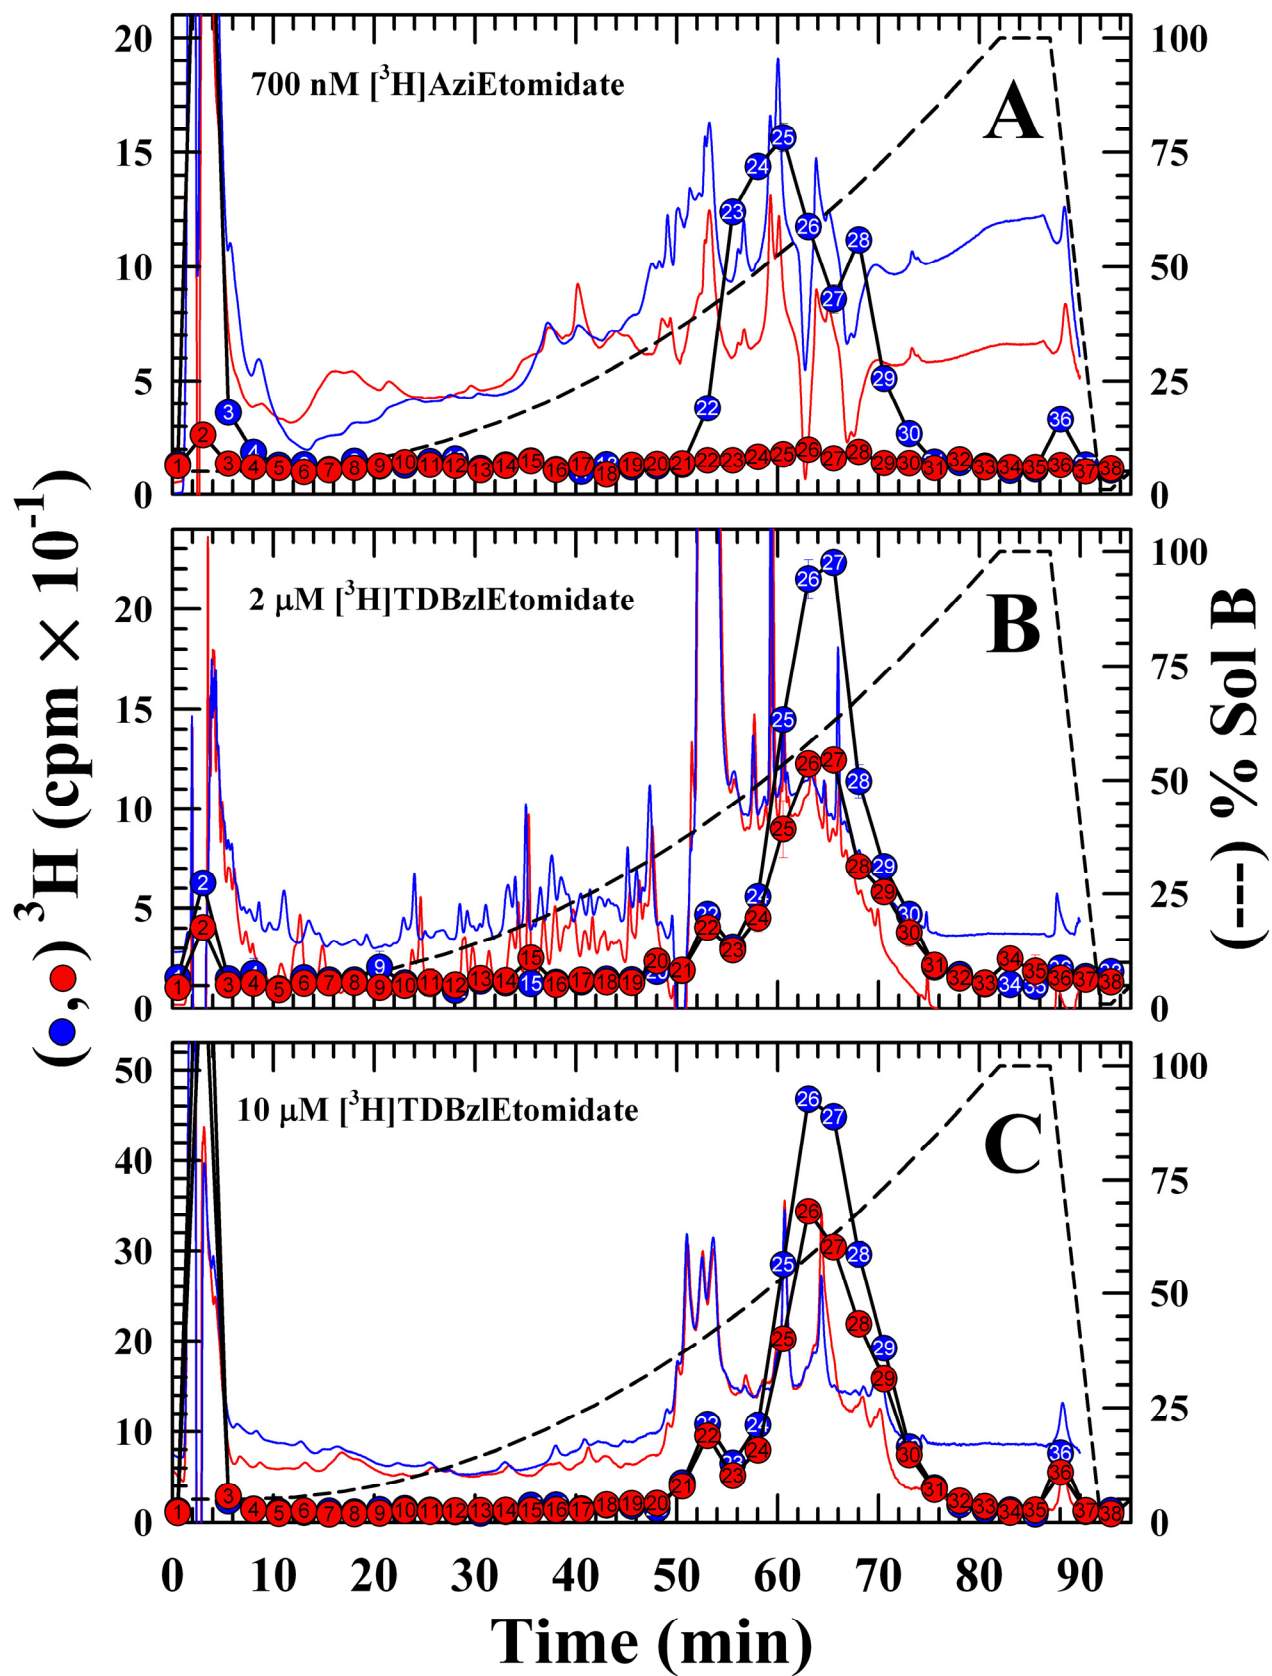

Supplemental Figure S9

**Supplemental Figure S9: Reversed-phase HPLC fractionations of Trypsin or EndoLys-C digests of [<sup>3</sup>H]azietomidate and [<sup>3</sup>H]TDBzl-etomidate photolabeled  $\alpha 1$  subunits.** From the same photolabeling experiment of Figure S8, aliquots of  $\alpha 1$  subunit from  $\alpha 1\beta 3$  GABA<sub>A</sub>R photolabeled with [<sup>3</sup>H]AziEtomidate (**A**) or [<sup>3</sup>H]TDBzlEtomidate (**B**, 2  $\mu$ M; **C**, 10  $\mu$ M) in the absence (**blue**) or presence (**red**) of 100  $\mu$ M etomidate were digested with either trypsin (**A**) or EndoLys-C (**B**, Princeton Separations, 2.5  $\mu$ g, 4 days, 20 °C; **C**, Roche, 0.5 U, 2 weeks, 20 °C) and separated by rpHPLC. Ten percent of each fraction was assayed for <sup>3</sup>H (●, ●). Also plotted are the absorbance at 215 nm (**red** / **blue** line) and the HPLC gradient (in % organic phase, ---). Total <sup>3</sup>H cpm injected and recovered (**-Et** / **+Et**): **A**, **17,270** and **12,310** cpm/ **770** and **950** cpm; **B**, **9,930** and **10,040** cpm/ **5,450** and **6,530** cpm; **C**, **13,370** and **9,830** cpm/ **10,340** cpm and **8,550** cpm.

Previous HPLC fractionations of EndoLys-C digests of the  $\alpha 1$  subunit (Li, Chiara et al., J. Neurosci.26:11599-11605 (2006)) established that a fragment beginning at  $\alpha 1$ Ile-392 and containing M4 elutes in fraction 24 or 25 (50-55 % organic) and that fragments beginning at  $\alpha 1$ Arg-221/Ile-223 containing  $\alpha 1$ M1 & M2 and at  $\alpha 1$ Val-280 containing  $\alpha 1$ M3 eluted in fractions 25-28 (55-70% organic). For the HPLC runs in **A**, fractions 25-26 were pooled and sequenced as shown in Figs. **6B**. For the HPLC runs in **B** & **C**, fractions 26-27 were pooled and sequenced as shown in Figs. **6D** & **6E**.

Sequence analysis of fraction 25 from **C** confirmed the presence of the fragment beginning at  $\alpha 1$ Ile-392, with no peaks of <sup>3</sup>H release seen while sequencing through  $\alpha 1$ M4.

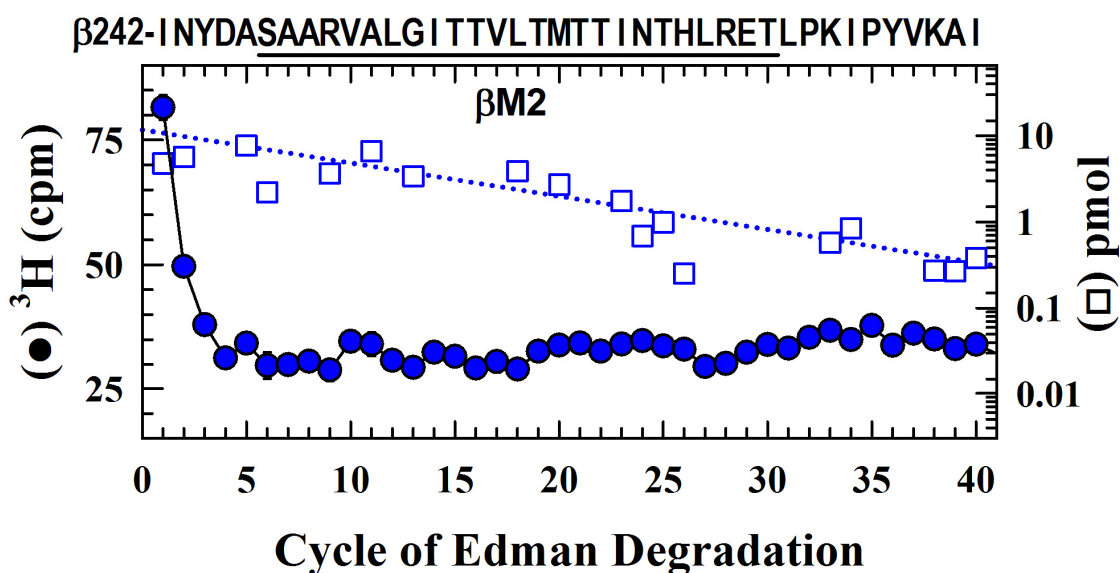

**Supplemental Figure S10: Sequence analysis of  $\beta$ 3M2 from [ $^3\text{H}$ ]TDBzl-etomidate labeled  $\alpha$ 1 $\beta$ 3 GABA<sub>A</sub>R found no photoincorporation.** An aliquot of  $\beta$ 3 subunit, eluted from an SDS-PAGE separation of  $\alpha$ 1 $\beta$ 3 GABA<sub>A</sub>R photolabeled with 3.5  $\mu\text{M}$  [ $^3\text{H}$ ]azietomidate in the absence (blue) of etomidate, was cleaved with BNPS-skatole and sequenced (7,550 cpm loaded, 1990 remaining on the filter after 50 cycles of Edman degradation). (The sample labeled in the presence of 100  $\mu\text{M}$  etomidate was not sequenced). The peptide beginning at  $\beta$ 3Ile-242 was detected ( $\square$ ,  $I_0 = 12$  pmol;  $R = 92\%$ ) along with the other 7 expected peptides produced from cleaving after the 7 Trp residues in  $\beta$ 3 (range 4 – 11 pmol). There was no photolabeling of the etomidate affinity determinant,  $\beta$ 3Asn-265 (cycle 24,  $<1$  cpm/pmol), and the background variations of  $^3\text{H}$  release while sequencing through  $\beta$ 3M2 indicated that photoincorporation, if it occurred, was at  $< 5$  cpm/pmol. A small peak of  $^3\text{H}$  release (6 cpm) was detected in cycle 49, consistent with photolabeling of  $\beta$ 3Val-290 at 80 cpm/pmol, the level of  $\beta$ 3Val-290 photolabeling determined by sequence analysis of the appropriate rHPLC fraction from an EndoGlu-C digest of  $\beta$ 3 subunit isolated in this photolabeling experiment.
